# **Nonlinear ridge regression improves robustness of cell-type-specific differential expression studies**

Fumihiko Takeuchi and Norihiro Kato

Department of Gene Diagnostics and Therapeutics, Research Institute, National Center for Global Health and Medicine (NCGM), Tokyo, Japan

## **Correspondence**

Fumihiko Takeuchi

Department of Gene Diagnostics and Therapeutics, Research Institute, National Center for Global Health and Medicine (NCGM)

1-21-1 Toyama, Shinjuku-ku, Tokyo, 162-8655, Japan

Email: [fumihiko@takeuchi.name](mailto:fumihiko@takeuchi.name)

1 **Abstract**

2 **Background:** Epigenome-wide association studies (EWAS) and differential  
3 gene expression analyses are generally performed on tissue samples, which  
4 consist of multiple cell types. Cell-type-specific effects of a trait, such as  
5 disease, on the omics expression are of interest but difficult or costly to  
6 measure experimentally. By measuring omics data for the bulk tissue, cell  
7 type composition of a sample can be inferred statistically. Subsequently, cell-  
8 type-specific effects are estimated by linear regression that includes terms  
9 representing the interaction between the cell type proportions and the trait.  
10 This approach involves two issues, scaling and multicollinearity.

11 **Results:** First, although cell composition is analyzed in linear scale,  
12 differential methylation/expression is analyzed suitably in the logit/log scale.  
13 To simultaneously analyze two scales, we developed nonlinear regression.  
14 Second, we show that the interaction terms are highly collinear, which is  
15 obstructive to ordinary regression. To cope with the multicollinearity, we  
16 applied ridge regularization. In simulated and real data, the improvement was  
17 modest by nonlinear regression and substantial by ridge regularization.

18 **Conclusion:** Nonlinear ridge regression performed cell-type-specific  
19 association test on bulk omics data more robustly than previous methods.  
20 The omicwas package for R implements nonlinear ridge regression for cell-  
21 type-specific EWAS, differential gene expression and QTL analyses. The  
22 software is freely available from <https://github.com/fumi-github/omicwas>

23

24 **Keywords**

25 Epigenome-wide association study, Differential gene expression analysis, Cell  
26 type, Ridge regression, Nonlinear regression, mQTL, eQTL

27

## 28 **Background**

29 Epigenome-wide association studies (EWAS) and differential gene expression  
30 analyses elucidate the association of disease traits (or conditions) with the  
31 level of omics expression, namely DNA methylation and gene expression.  
32 Thus far, tissue samples, which consist of heterogeneous cell types, have  
33 mainly been examined, because cell sorting is not feasible in most tissues  
34 and single-cell assay is still expensive. Nevertheless, the cell type  
35 composition of a sample can be quantified statistically by comparing omics  
36 measurement of the target sample with reference data obtained from sorted  
37 or single cells [1,2]. By utilizing the composition, the disease association  
38 specific to a cell type was statistically inferred for gene expression [3-10] and  
39 DNA methylation [11-14].

40 For the imputation of cell type composition, omics markers are usually  
41 analyzed in the original linear scale, which measures the proportion of mRNA  
42 molecules from a specific gene or the proportion of methylated cytosine  
43 molecules among all cytosines at a specific CpG site [15]. The proportion can  
44 differ between cell types, and the weighted average of cell-type-specific  
45 proportions becomes the proportion in a bulk tissue sample. Using the fact  
46 that the weight equals the cell type composition, the cell type composition of  
47 a sample is imputed. In contrast, gene expression analyses are performed in  
48 the log-transformed scale because the signal and noise are normally  
49 distributed after log-transformation [16]. In DNA methylation analysis, the  
50 logit-transformed scale, which is called the M-value, is statistically valid [17].  
51 Consequently, the optimal scales for analyzing differential gene expression  
52 or methylation can differ from the optimal scale for analyzing cell type  
53 composition.

54 Aiming to perform cell-type-specific EWAS or differential gene expression  
55 analyses by using unsorted tissue samples, we study two issues that have  
56 been overlooked. Whereas previous studies were performed in linear scale,  
57 we develop a nonlinear regression, which simultaneously analyzes cell type  
58 composition in linear scale and differential expression/methylation in log/logit  
59 scale. The second issue is multicollinearity. Cell-type-specific effects of a trait,  
60 such as disease, on omics expression are usually estimated by linear

61 regression that includes terms representing the interaction between the cell  
62 type proportions and the trait. We show that the interaction terms can  
63 mutually be highly correlated, which obstructs ordinary regression. To cope  
64 with the multicollinearity, we implement ridge regularization. Our methods  
65 and previous ones are compared in simulated and real data.  
66

## 67 **Results**

### 68 **Multicollinearity of interaction terms**

69 Typically, cell-type-specific effects of a trait on omics marker expression is  
70 analyzed by the linear regression in equation (2). The goal is to estimate  $\beta_{h,k}$   
71 the effect of trait  $k$  on the expression level in cell type  $h$ . This is estimated  
72 based on the relation between the bulk expression level  $Y_i$  of a sample and  
73 the regressor  $W_{h,i}X_{i,k}$ , which is an interaction term defined as the product of  
74 the cell type proportion  $W_{h,i}$  and the trait value  $X_{i,k}$  of the sample. The  
75 variable  $W_h$  for cell type composition cannot be mean-centered, and  
76 interaction terms involving uncentered variables cause multicollinearity [18].  
77 We first survey the extent of multicollinearity in real data for cell-type-specific  
78 association.

79 In peripheral blood leukocyte data from a rheumatoid arthritis study  
80 (GSE42861), the proportion of cell types ranged from 0.59 for neutrophils to  
81 0.01 for eosinophils (Table 1A). The proportion of neutrophils was negatively  
82 correlated with the proportion of other cell types (apart from monocytes) with  
83 correlation coefficient of  $-0.68$  to  $-0.46$ , whereas the correlation was weaker  
84 for other pairs (Table 1B). Rheumatoid arthritis status was modestly  
85 correlated with proportions of cell types. The product of the disease status  
86  $X_k$ , centered to have zero mean, and the proportion of a cell type becomes  
87 an interaction term. The correlation coefficients between the interaction  
88 terms are mostly  $>0.8$ , apart from eosinophils (Table 1C). The ratio of mean  
89 to SD of the proportion is high for all cell types apart from eosinophils (Table  
90 1A). The interaction terms for high-ratio cell types are strongly correlated

91 with  $X_k$ , which in turn causes strong correlation between the relevant  
92 interaction terms.

93 The situation was the same for the interaction with age in GTEx data. The  
94 granulocytes (which include neutrophils and eosinophils) were the most  
95 abundant (Table 2A). The proportion of granulocytes was negatively  
96 correlated with other cell types (apart from monocytes) with correlation  
97 coefficient of  $-0.89$  to  $-0.41$ , and the correlation between other pairs was  
98 generally weaker (Table 2B). Age was modestly correlated with proportions  
99 of cell types. In this dataset, the ratio of mean to SD of the proportion was  
100 high in all cell types (Table 2A), which caused strong mutual correlation  
101 between interaction terms (Table 2C).

102 In the above empirical data, multicollinearity between interaction terms  
103 seemed to arise not due to the correlation between cell type proportions or  
104  $X_k$ , but due to the high ratio of mean to SD in the cell type proportions.  
105 Subsequently, this property was derived mathematically. As we derived in  
106 equation (17), the correlation between interaction terms  $W_h X_k$  and  $W_{h'} X_k$   
107 approaches to one, when the ratios  $E[W_h]/SD[W_h]$  and  $E[W_{h'}]/SD[W_{h'}]$  are  
108 high, irrespective of  $Cor[W_h, W_{h'}]$  (Figure 1). The ratio was 1.6 to 5.3 (apart  
109 from eosinophils) in the rheumatoid arthritis dataset and  $\geq 4.3$  in the GTEx  
110 dataset. We looked up datasets of several ethnicities and found the ratio to  
111 be  $\geq 1.5$  in majority of cell types (Additional file 1: Table S1). Thus,  
112 multicollinearity can be a common problem for cell-type-specific association  
113 analyses.

#### 114 **Evaluation in simulated data**

115 By using simulated data, we evaluated previous methods and new  
116 approaches of the omicwas package. In order to simultaneously analyze two  
117 scales, the linear scale for heterogeneous cell mixing and the log/logit scale  
118 for trait effects, we applied nonlinear regression in omicwas (equations (4)  
119 and (5)). To cope with the multicollinearity of interaction terms, we applied  
120 ridge regularization (equations (9) and (10)).

121 Previous regression type methods are based either on the full model of  
122 linear regression (equation (2)) or the marginal model (equation (3)). The

123 full model fits and tests cell-type-specific effects for all cell types  
124 simultaneously, and its derivatives include TOAST, csSAM.lm,  
125 CellDMC.unfiltered and CellDMC.filtered. The marginal model fits and tests  
126 cell-type-specific effect for one cell type at a time, and its derivatives include  
127 csSAM.monovariate and TCA.

128 The simulation data was generated from real datasets of DNA methylation  
129 and gene expression. The original cell type composition was retained for all  
130 samples, and the case-control status was randomly assigned. In each sample,  
131 expression level in each cell type was randomly determined according to a  
132 scenario, and then averaged according to the sample's cell type composition.  
133 Under each statistical algorithm, the disease association in the target cell type  
134 was assessed by a Z-score, comparing cases vs controls.

135 In scenario A for DNA methylation, expression of all cell types had  
136 identical distribution, irrespective of the case/control status (Figure 2A). The  
137 type I error rate was controlled ( $\leq 0.05$ ) in all algorithms. In scenario B, cases  
138 had higher expression level in one randomly selected cell type, and that cell  
139 type was tested (Figure 2B). Here, the most appropriate algorithm is the  
140 marginal test applied to the perturbed cell type, which indeed attained the  
141 highest power. For the most abundant neutrophils, the Z-score was in the  
142 high range of 9.9 to 14.9 for the marginal test. With regards to the power,  
143 the ridge regression methods (omicwas.identity.ridge and  
144 omicwas.logit.ridge) came next. The algorithms based on full model, without  
145 ridge regularization, (Full, TOAST, CellDMC.unfiltered, omicwas.identity and  
146 omicwas.logit) gained modest power. TCA, which is similar to the marginal  
147 test, detected neutrophil-specific association with high Z-score, but the power  
148 over all cell types was modest. In scenario C, the expression level of cases  
149 was lower in one cell type, which was not the tested cell type (Figure 2C).  
150 Since the expression of the tested cell type is identical between cases and  
151 controls, a correct algorithm should detect no signal. The type I error rate  
152 was inflated, being highest for the marginal test, followed by the ridge  
153 regression methods and TCA. Extremely strong spurious signals of Z-score  $<$   
154  $-6$  were detected in marginal and TCA. Scenario D combined scenarios B and  
155 C, where the tested cell type had higher expression in cases, and one non-

156 tested cell type had lower expression in cases (Figure 2D). The distribution  
157 of neutrophil Z-score was similar to scenario B, and the spurious signals with  
158 low Z-scores were similar to scenario C. Over all scenarios, the similarity in  
159 performance of omicwas.identity vs omicwas.logit, as well as  
160 omicwas.identity.ridge vs omicwas.logit.ridge, indicates that the scaling was  
161 not influential in DNA methylation data.

162 The results for simulated gene expression data were similar. In scenario  
163 A with no true signal, type I error rate was controlled ( $\leq 0.05$ ) in all algorithms  
164 (Figure 3A). In scenario B, where true signal exists only for the tested cell  
165 type, the power was the highest in marginal and relatively high in  
166 csSAM.monovariate (Figure 3B). The power was in decreasing order,  
167 omicwas.log.ridge > omicwas.identity.ridge > omicwas.log >  
168 omicwas.identity; proper scaling modestly improved performance. In  
169 scenario C, where cases have lower expression in one non-target cell type,  
170 the type I error was inflated in the negative direction, with the largest inflation  
171 in marginal, and moderate inflation in ridge regression methods and  
172 csSAM.monovariate (Figure 3C). Extremely strong false signals of Z-score <  
173  $-6$  occurred in marginal and csSAM.monovariate. In scenario D, where the  
174 tested cell type has higher expression in cases, while one non-tested cell type  
175 has lower expression, we could observe the overlay of power gain of scenario  
176 B and type I error inflation of scenario C (Figure 3D).

177 Although we roughly grouped previous algorithms into derivatives of full  
178 or derivatives of marginal, some implement treatments beyond simple linear  
179 models. For example, the TCA algorithm tends to detect neutrophil signals  
180 similarly as the marginal test (Fig. 2B), yet had smaller type I error rate (Fig.  
181 2C).

## 182 **Cell-type-specific association with rheumatoid arthritis and age**

183 The cell-type-specific association of DNA methylation with rheumatoid  
184 arthritis was predicted using bulk peripheral blood leukocyte data and was  
185 evaluated in sorted monocytes (Figure 4A) and B cells (Figure 4B). Whereas  
186 the full model (and its derivatives) performed the best and the marginal  
187 model (and its derivatives) performed the worst in monocytes, the

188 performance ranking was opposite in B cells. A robust algorithm would  
189 consistently achieve high performance relative to the best algorithm in each  
190 instance. Nonlinear ridge regression (omicwas.logit.ridge) was the most  
191 robust, performing 65% to 93% relative to the best method.

192 The cell-type-specific association of gene expression with age was  
193 predicted using whole blood data and was evaluated in sorted CD4<sup>+</sup> T cells  
194 (Figure 4C) and monocytes (Figure 4D). All algorithms performed poorly in  
195 CD4<sup>+</sup> T cells, and the marginal model performed the best in monocytes.  
196 Overall, nonlinear ridge regression (omicwas.log.ridge) was next to the  
197 marginal model, performing 21% to 47% to the marginal.

198 For dataset GSE42861 and for GTEx whole blood, the omicwas.logit.ridge  
199 and omicwas.log.ridge models of the omicwas package was computed in 8.1  
200 and 0.7 hours respectively, using 8 cores of a 2.5 GHz Xeon CPU Linux server.  
201

## 202 Discussion

203 Aiming to elucidate cell-type-specific trait association in DNA methylation and  
204 gene expression, this article explored two aspects, multicollinearity and scale.  
205 We observed multicollinearity in real data and derived mathematically how it  
206 emerges. To cope with the multicollinearity, we proposed ridge regression. To  
207 properly handle multiple scales simultaneously, we developed nonlinear  
208 regression. By testing in simulated and real data, we found proper scaling to  
209 modestly improve performance. In contrast, ridge regression achieved  
210 performance that was more robust than previous methods.

211 The statistical methods discussed in this article are applicable, in principle,  
212 to any tissue. For validation of the methods, we need datasets for bulk tissue  
213 as well as sorted cells, ideally of >100 samples. Currently, the publicly  
214 available data is limited to peripheral blood. By no means, we claim the  
215 rheumatoid arthritis EWAS datasets [19-21] or the datasets for age  
216 association of gene expression [22,23] to be representative. Nevertheless,  
217 we think verification in real data is important, which has not been performed  
218 previously in large sample size.

219 By the performance in simulated and real data, we can roughly divide



220 algorithms into three groups: full (and its derivatives), marginal (and its  
221 derivatives) and ridge models. In marginal models, we test one cell type at a  
222 time. If we knew in advance that one particular cell type is associated with  
223 the trait, which would be a rare situation, testing that cell type in the marginal  
224 model is the most simple and correct approach. Indeed, under such a  
225 simulated scenario, the marginal test attained highest power (Figs. 2B, 3B).  
226 However, when the test target cell type is not associated, but instead another  
227 cell type is associated, the marginal tests can pick up false signals due to the  
228 collinearity between regressor variables (Figs. 2C, 3C). The high power and  
229 high error rate of the marginal tests can lead to unstable performance; in real  
230 data, the marginal tests were the most powerful for detecting B cell specific  
231 association with rheumatoid arthritis (Fig. 4B) but were the least powerful for  
232 monocytes (Fig. 4A). The full model tests all cell types together, and its  
233 performance was the opposite of the marginal. By fitting all cell types  
234 simultaneously, the full model adjusts for the effects of other cell types. The  
235 full models did not detect false association coming indirectly from non-target  
236 cell types (Figs. 2C, 3C), yet their power was relatively low (Figs. 2B, 3B).  
237 The ridge tests (omicwas.identity.ridge, omicwas.logit.ridge and  
238 omicwas.log.ridge) were in the middle between full and marginal tests with  
239 regards to the power (Figs. 2B, 3B, 4). The false positives of ridge tests were  
240 modest compared to the marginal tests (Figs. 2C, 3C).

241 We mathematically modeled and implemented the logit scale for DNA  
242 methylation and log scale for gene expression. It turns out that the  
243 improvement by formulating the nonlinear scale was negligible for DNA  
244 methylation (Fig. 2B) and modest for gene expression (Fig. 3B;  
245 omicwas.identity vs omicwas.log, and omicwas.identity.ridge vs  
246 omicwas.log.ridge). This implies that previous works, which were almost  
247 exclusively in linear scale, were not losing much power due to scaling.

248

## 249 **Conclusions**

250 For cell-type-specific differential expression analysis by using unsorted tissue  
251 samples, we recommend trying ridge regression as a first choice because it

252 balances power and type I error. Although marginal tests can be powerful  
253 when the tested cell type actually is the only one associated with the trait,  
254 caution is needed due to its high type I error rate. For a signal detected by  
255 the marginal test, reanalysis in full model could be valuable. Ridge regression  
256 is preferable compared to the full model without ridge regularization because  
257 ridge estimator of the effect size has smaller MSE (equation (13)). Nonlinear  
258 regression, which models scales properly, is recommended more than the  
259 linear regression, yet the difference can be modest. We do not claim the ridge  
260 model to substitute previous models. Indeed, we think none of the current  
261 algorithms is superior to others in all aspects, indicating possibility for future  
262 improvement.

263

## 264 **Methods**

### 265 **Linear regression**

266 We begin by describing the linear regressions used in previous studies. Let  
267 the indexes be  $h$  for a cell type,  $i$  for a sample,  $j$  for an omics marker (CpG  
268 site or gene),  $k$  for a trait that has cell-type-specific effects on marker  
269 expression, and  $l$  for a trait that has a uniform effect across cell types. The  
270 input data is given in four matrices. The matrix  $W_{h,i}$  represents cell type  
271 composition. The matrices  $X_{i,k}$  and  $C_{i,l}$  represent the values of the traits that  
272 have cell-type-specific and uniform effects, respectively. We assume the two  
273 matrices are centered:  $\sum_i X_{i,k} = \sum_i C_{i,l} = 0$ . The matrix  $Y_{i,j}$  represents the  
274 omics marker expression level in tissue samples.

275 The parameters we estimate are the cell-type-specific trait effect  $\beta_{h,j,k}$ ,  
276 tissue-uniform trait effect  $\gamma_{j,l}$ , and basal marker level  $\alpha_{h,j}$  in each cell type.  
277 For the remaining of the first five sections (up to “Multicollinearity of  
278 interaction terms”), we focus on one marker  $j$ , and omit the index for  
279 readability. For cell type  $h$ , the marker level of sample  $i$  is

$$280 \quad \alpha_h + \sum_k \beta_{h,k} X_{i,k}. \quad (1)$$

281 This is a representative value rather than a mean because we do not model  
282 a probability distribution for cell-type-specific expression. By averaging the  
283 value over cell types with weight  $W_{h,i}$ , and combining with the tissue-uniform  
284 trait effects, we obtain the mean marker level in bulk tissue of sample  $i$ ,

$$285 \quad \mu_i = \sum_n \alpha_n W_{n,i} + \sum_{n,k} \beta_{n,k} W_{n,i} X_{i,k} + \sum_l \gamma_l C_{i,l}.$$

286 With regards to the statistical model, we assume the error of the marker  
287 level to be normally distributed with variance  $\sigma^2$ , independently among  
288 samples, as

$$289 \quad Y_i = \mu_i + \varepsilon_i,$$
$$290 \quad \varepsilon_i \sim N(0, \sigma^2).$$

291 The statistical significance of all parameters is tested under the *full* model of  
292 linear regression,

$$293 \quad Y_i = \sum_h \alpha_h W_{h,i} + \sum_{h,k} \beta_{h,k} W_{h,i} X_{i,k} + \sum_l \gamma_l C_{i,l} + \varepsilon_i, \quad (2)$$

294 or its derivatives [5,10,13]. Alternatively, the cell-type-specific effects of  
295 traits can be fitted and tested for one cell type  $h$  at a time by the *marginal*  
296 model,

$$297 \quad Y_i = \sum_{h'} \alpha_{h'} W_{h',i} + \sum_k \beta_{h,k} W_{h,i} X_{i,k} + \sum_l \gamma_l C_{i,l} + \varepsilon_i, \quad (3)$$

298 or its derivatives [7-9,11,14].

## 299 **Nonlinear regression**

300 Aiming to simultaneously analyze cell type composition in linear scale and  
301 differential expression/methylation in log/logit scale, we develop a nonlinear  
302 regression model. The differential analyses are performed after applying  
303 normalizing transformation. The normalizing function is the natural logarithm  
304  $f = \log$  for gene expression, and  $f = \text{logit}$  for methylation (see Background).  
305 Conventional linear regression can be formulated by defining  $f$  as the identity  
306 function. We denote the inverse function of  $f$  by  $g$ ;  $g = \exp$  for gene  
307 expression, and  $g = \text{logistic}$  for methylation. Thus,  $f$  converts from the linear  
308 scale to the normalized scale, and  $g$  does the opposite.

309 The marker level in a specific cell type (formula (1)) is modeled in the  
310 normalized scale. The level is linearized by applying function  $g$ , then averaged  
311 over cell types with weight  $W_{h,i}$ , and normalized by applying function  $f$ .  
312 Combined with the tissue-uniform trait effects, the mean normalized marker  
313 level in bulk tissue of sample  $i$  becomes

$$314 \quad \mu_i = f\left(\sum_h W_{h,i} g\left(\alpha_h + \sum_k \beta_{h,k} X_{i,k}\right)\right) + \sum_l \gamma_l C_{i,l}. \quad (4)$$

315 We assume the normalized marker level to have an error that is normally  
316 distributed with variance  $\sigma^2$ , independently among samples, as

$$317 \quad f(Y_i) = \mu_i + \varepsilon_i, \quad (5)$$

$$318 \quad \varepsilon_i \sim N(0, \sigma^2).$$

319 We obtain the ordinary least squares (OLS) estimator of the parameters by  
320 minimizing the residual sum of squares,

$$321 \quad \text{RSS} = \sum_i (f(Y_i) - \mu_i)^2, \quad (6)$$

322 and then estimate the error variance as

$$323 \quad \widehat{\sigma^2} = \frac{1}{n-p} \text{RSS}, \quad (7)$$

324 where  $n$  is the number of samples and  $p$  is the number of parameters [[24],  
325 section 6.3.1].

## 326 Ridge regression

327 The parameters  $\beta_{h,k}$  for cell-type-specific effect cannot be estimated  
328 accurately by ordinary linear regression because the regressors  $W_{h,i} X_{i,k}$  in  
329 equation (2) are highly correlated between cell types (see below).  
330 Multicollinearity also occurs to the nonlinear case in formula (4) because of  
331 local linearity. To cope with the multicollinearity, we apply ridge regression  
332 with a regularization parameter  $\lambda \geq 0$ , and obtain the ridge estimator of the  
333 parameters that minimizes

$$334 \quad \text{RSS} + \lambda \sum_{h,k} \beta_{h,k}^2, \quad (8)$$

335 where the second term penalizes  $\beta_{h,k}$  for taking large absolute values. The  
 336 ridge estimator  $\hat{\theta}(\lambda)$  is asymptotically normally distributed (see Additional file  
 337 2: [Supplementary note](#)) with

$$338 \quad \text{Mean}[\hat{\theta}(\lambda)] = Q(\lambda)^{-1} Q(0) \theta, \quad (9)$$

$$339 \quad \text{Var}[\hat{\theta}(\lambda)] = \sigma^2 Q(\lambda)^{-1} \left( \frac{\partial \mu(\theta)}{\partial \theta} \right)^T \left( \frac{\partial \mu(\theta)}{\partial \theta} \right) Q(\lambda)^{-1}, \quad (10)$$

$$340 \quad Q(\lambda) = \left( \frac{\partial \mu(\theta)}{\partial \theta} \right)^T \left( \frac{\partial \mu(\theta)}{\partial \theta} \right) + \lambda \begin{pmatrix} 0 & 0 & 0 \\ 0 & I & 0 \\ 0 & 0 & 0 \end{pmatrix} - (f(Y) - \mu(\theta)) \cdot \left( \frac{\partial^2 \mu(\theta)}{\partial \theta \partial \theta^T} \right),$$

341 where  $\mu$  is the vector form of  $\mu_i$ ,  $\theta$  is the vector form of the parameters  $\alpha_h$ ,  
 342  $\beta_{h,k}$  and  $\gamma_l$  combined,  $(\partial \mu / \partial \theta)$  is the Jacobian matrix,  $(\partial^2 \mu / \partial \theta \partial \theta^T)$  is the  
 343 array of Hessian matrices for  $\mu_i$  taken over samples, and  $T$  indicates matrix  
 344 transposition. The product of  $f(Y) - \mu(\theta)$  and the Hessian is taken by  
 345 multiplying for each sample and then summing up over samples. The matrix  
 346 after  $\lambda$  has one only in the diagonal corresponding to  $\beta_{h,k}$ . The assigned value  
 347  $\theta$  is the true parameter value. By taking the expectation of  $Q$ , we obtain a  
 348 rougher approximation [25] as

$$349 \quad \text{Mean}[\hat{\theta}(\lambda)] = Q^*(\lambda)^{-1} Q^*(0) \theta, \quad (11)$$

$$350 \quad \text{Var}[\hat{\theta}(\lambda)] = \sigma^2 Q^*(\lambda)^{-1} \left( \frac{\partial \mu(\theta)}{\partial \theta} \right)^T \left( \frac{\partial \mu(\theta)}{\partial \theta} \right) Q^*(\lambda)^{-1}, \quad (12)$$

$$351 \quad Q^*(\lambda) = E[Q(\lambda)] = \left( \frac{\partial \mu(\theta)}{\partial \theta} \right)^T \left( \frac{\partial \mu(\theta)}{\partial \theta} \right) + \lambda \begin{pmatrix} 0 & 0 & 0 \\ 0 & I & 0 \\ 0 & 0 & 0 \end{pmatrix}.$$

352 The matrices  $Q$  and  $Q^*$  are the observed and expected Fisher matrices  
 353 multiplied by  $\sigma^2$  and adapted to ridge regression, respectively.

354 Since our objective is to predict the cell-type-specific trait effects, we  
 355 choose the regularization parameter  $\lambda$  that can minimize the mean squared  
 356 error (MSE) of  $\beta_{h,k}$ . Our methodology is based on [26]. To simplify the  
 357 explanation, we assume the Jacobian matrices  $(\partial \mu(\theta) / \partial \alpha)$ ,  $(\partial \mu(\theta) / \partial \beta)$  and  
 358  $(\partial \mu(\theta) / \partial \gamma)$  to be mutually orthogonal, where  $\alpha$ ,  $\beta$  and  $\gamma$  are the vector  
 359 forms of  $\alpha_h$ ,  $\beta_{h,k}$  and  $\gamma_l$ , respectively. Then, from formulae (11) and (12), the  
 360 ridge estimator  $\hat{\beta}(\lambda)$  is asymptotically normally distributed with

$$361 \quad \text{Mean}[\hat{\beta}(\lambda)] = \left[ \left( \frac{\partial \mu(\theta)}{\partial \beta} \right)^T \left( \frac{\partial \mu(\theta)}{\partial \beta} \right) + \lambda I \right]^{-1} \left( \frac{\partial \mu(\theta)}{\partial \beta} \right)^T \left( \frac{\partial \mu(\theta)}{\partial \beta} \right) \beta,$$

$$\begin{aligned} \text{362} \quad \text{Var}[\widehat{\boldsymbol{\beta}}(\lambda)] &= \sigma^2 \left[ \left( \frac{\partial \boldsymbol{\mu}(\boldsymbol{\theta})}{\partial \boldsymbol{\beta}} \right)^T \left( \frac{\partial \boldsymbol{\mu}(\boldsymbol{\theta})}{\partial \boldsymbol{\beta}} \right) + \lambda I \right]^{-1} \left( \frac{\partial \boldsymbol{\mu}(\boldsymbol{\theta})}{\partial \boldsymbol{\beta}} \right)^T \left( \frac{\partial \boldsymbol{\mu}(\boldsymbol{\theta})}{\partial \boldsymbol{\beta}} \right) \\ \text{363} \quad &\left[ \left( \frac{\partial \boldsymbol{\mu}(\boldsymbol{\theta})}{\partial \boldsymbol{\beta}} \right)^T \left( \frac{\partial \boldsymbol{\mu}(\boldsymbol{\theta})}{\partial \boldsymbol{\beta}} \right) + \lambda I \right]^{-1}, \end{aligned}$$

364 where the assigned values  $\boldsymbol{\theta}$  and  $\boldsymbol{\beta}$  are the true parameter values. We apply  
365 singular value decomposition

$$\text{366} \quad \left( \frac{\partial \boldsymbol{\mu}(\boldsymbol{\theta})}{\partial \boldsymbol{\beta}} \right) = U D V^T,$$

367 where  $U$  and  $V$  are orthogonal matrices, the columns of  $V$  are  $\mathbf{v}_1, \dots, \mathbf{v}_M$ , and  
368 the diagonals of diagonal matrix  $D$  are sorted  $d_1 \geq \dots \geq d_M \geq 0$ . The bias,  
369 variance and MSE of the ridge estimator are decomposed as

$$\begin{aligned} \text{370} \quad \text{Bias}[\widehat{\boldsymbol{\beta}}(\lambda)] &= \mathbb{E}[\widehat{\boldsymbol{\beta}}(\lambda) - \boldsymbol{\beta}] \\ \text{371} \quad &= -\lambda \left[ \left( \frac{\partial \boldsymbol{\mu}(\boldsymbol{\theta})}{\partial \boldsymbol{\beta}} \right)^T \left( \frac{\partial \boldsymbol{\mu}(\boldsymbol{\theta})}{\partial \boldsymbol{\beta}} \right) + \lambda I \right]^{-1} \boldsymbol{\beta} \\ \text{372} \quad &= \left\{ \sum_{m=1}^M \mathbf{v}_m \frac{-\lambda}{d_m^2 + \lambda} \mathbf{v}_m^T \right\} \boldsymbol{\beta}, \\ \text{373} \quad \text{Var}[\widehat{\boldsymbol{\beta}}(\lambda)] &= \sigma^2 \sum_{m=1}^M \mathbf{v}_m \frac{d_m^2}{(d_m^2 + \lambda)^2} \mathbf{v}_m^T, \\ \text{374} \quad \text{MSE}[\widehat{\boldsymbol{\beta}}(\lambda)] &= \mathbb{E}[\|\widehat{\boldsymbol{\beta}}(\lambda) - \boldsymbol{\beta}\|^2] \\ \text{375} \quad &= \|\text{Bias}[\widehat{\boldsymbol{\beta}}(\lambda)]\|^2 + \text{tr}(\text{Var}[\widehat{\boldsymbol{\beta}}(\lambda)]) \\ \text{376} \quad &= \sum_{m=1}^M \left( \frac{\lambda}{d_m^2 + \lambda} \right)^2 (\mathbf{v}_m^T \boldsymbol{\beta})^2 + \left( \frac{d_m^2}{d_m^2 + \lambda} \right)^2 \left( \frac{\sigma^2}{d_m^2} \right). \quad (13) \end{aligned}$$

377 For each  $m$  in the summation of (13), the minimum of the summand is  
378 attained at  $\lambda_m = \sigma^2 / (\mathbf{v}_m^T \boldsymbol{\beta})^2$ . To minimize MSE, we need to find some  
379 “average” of the optimal  $\lambda_m$  over the range of  $m$ . Hoerl et al. [27] proposed  
380 to take the harmonic mean  $\lambda = M\sigma^2 / \|\boldsymbol{\beta}\|^2$ . However, if an OLS estimator  $\widehat{\boldsymbol{\beta}}(0)$   
381 is plugged in,  $\|\boldsymbol{\beta}\|^2$  is biased upwards, and  $\lambda$  is biased downwards. Indeed,  
382 with regards to the estimator of  $1/\sqrt{\lambda_m}$ , we notice that

$$\text{383} \quad \frac{1}{\sigma} \mathbf{v}_m^T \widehat{\boldsymbol{\beta}}(0) \sim N\left(\frac{1}{\sigma} \mathbf{v}_m^T \boldsymbol{\beta}, \frac{1}{d_m^2}\right),$$

384 where the terms with larger  $m$  have larger variance. Thus, we take the  
385 average of  $(\mathbf{v}_m^T \widehat{\boldsymbol{\beta}}(0))^2 / \sigma^2$ , weighted by  $d_m^2 / \sum_{m=1}^M d_m^2$ , and also subtract the  
386 upward bias as,

387 
$$\kappa = \frac{1}{\sum_{m=1}^M d_m^2} \sum_{m=1}^M \left\{ \frac{d_m^2 (\mathbf{v}_m^T \hat{\boldsymbol{\beta}}(0))^2}{\sigma^2} - 1 \right\}. \quad (14)$$

388 The weighting and subtraction were mentioned in [26], where the subtraction  
 389 term was dismissed, under the assumption of large effect-size  $\boldsymbol{\beta}$ . Since the  
 390 effect-size could be small in our application, we keep the subtraction term.  
 391 The statistic  $\kappa$  can be nonpositive, and is unbiased in the sense that

392 
$$E[\kappa] = \frac{1}{\sum_{m=1}^M d_m^2} \sum_{m=1}^M \frac{d_m^2 (\mathbf{v}_m^T \boldsymbol{\beta})^2}{\sigma^2} = \frac{1}{\sum_{m=1}^M d_m^2} \sum_{m=1}^M \frac{d_m^2}{\lambda_m}.$$

393 Our choice of regularization parameter is

394 
$$\lambda = \begin{cases} 1/\kappa & \text{if } \kappa > 0, \\ d_1^2 & \text{otherwise,} \end{cases} \quad (15)$$

395 where  $d_1^2$  is taken instead of positive infinity.

### 396 **Implementation of omicwas package**

397 For each omics marker, the parameters  $\boldsymbol{\alpha}$ ,  $\boldsymbol{\beta}$  and  $\boldsymbol{\gamma}$  (denoted in combination  
 398 by  $\boldsymbol{\theta}$ ) are estimated and tested by nonlinear ridge regression in the following  
 399 steps. As we assume the magnitude of trait effects  $\boldsymbol{\beta}$  and  $\boldsymbol{\gamma}$  to be much  
 400 smaller than that of basal marker level  $\boldsymbol{\alpha}$ , we first fit  $\boldsymbol{\alpha}$  alone for numerical  
 401 stability.

- 402 1. Compute OLS estimator  $\hat{\boldsymbol{\alpha}}(0)$  by minimizing formula (6) under  $\boldsymbol{\beta} = \boldsymbol{\gamma} = \mathbf{0}$ .
- 403 Apply Wald test.
- 404 2. Calculate  $\hat{\sigma}^2$  by formula (7). Use it as a substitute for  $\sigma^2$ . The residual  
 405 degrees of freedom  $n - p$  is the number of samples minus the number of  
 406 parameters in  $\boldsymbol{\alpha}$ .
- 407 3. Compute OLS estimators  $\hat{\boldsymbol{\beta}}(0)$  and  $\hat{\boldsymbol{\gamma}}(0)$  by minimizing formula (6) under  
 408  $\boldsymbol{\alpha} = \hat{\boldsymbol{\alpha}}(0)$ . Let  $\hat{\boldsymbol{\theta}}(0) = (\hat{\boldsymbol{\alpha}}(0)^T, \hat{\boldsymbol{\beta}}(0)^T, \hat{\boldsymbol{\gamma}}(0)^T)^T$ .
- 409 4. Apply singular value decomposition  $(\partial \boldsymbol{\mu}(\hat{\boldsymbol{\theta}}(0))/\partial \boldsymbol{\beta}) = UDV^T$ .
- 410 5. Calculate  $\kappa$  and then the regularization parameter  $\lambda$  by formulae (14)  
 411 and (15).
- 412 6. Compute ridge estimators  $\hat{\boldsymbol{\beta}}(\lambda)$  and  $\hat{\boldsymbol{\gamma}}(\lambda)$  by minimizing formula (8) under  
 413  $\boldsymbol{\alpha} = \hat{\boldsymbol{\alpha}}(0)$ . Let  $\hat{\boldsymbol{\theta}}(\lambda) = (\hat{\boldsymbol{\alpha}}(0)^T, \hat{\boldsymbol{\beta}}(\lambda)^T, \hat{\boldsymbol{\gamma}}(\lambda)^T)^T$ .
- 414 7. Approximate the variance of ridge estimator, according to formula (10),

415 by

$$416 \quad \text{Var} \left[ \begin{pmatrix} \hat{\beta}(\lambda) \\ \hat{\gamma}(\lambda) \end{pmatrix} \right] = \hat{\sigma}^2 Q(\lambda)^{-1} \begin{pmatrix} \frac{\partial \mu(\hat{\theta}(\lambda))}{\partial \begin{pmatrix} \beta \\ \gamma \end{pmatrix}} \end{pmatrix}^T \begin{pmatrix} \frac{\partial \mu(\hat{\theta}(\lambda))}{\partial \begin{pmatrix} \beta \\ \gamma \end{pmatrix}} \end{pmatrix} Q(\lambda)^{-1},$$

$$417 \quad Q(\lambda) = \begin{pmatrix} \frac{\partial \mu(\hat{\theta}(\lambda))}{\partial \begin{pmatrix} \beta \\ \gamma \end{pmatrix}} \end{pmatrix}^T \begin{pmatrix} \frac{\partial \mu(\hat{\theta}(\lambda))}{\partial \begin{pmatrix} \beta \\ \gamma \end{pmatrix}} \end{pmatrix} + \lambda \begin{pmatrix} I & O \\ O & O \end{pmatrix} - \left( f(Y) - \mu(\hat{\theta}(\lambda)) \right) \cdot \begin{pmatrix} \frac{\partial^2 \mu(\hat{\theta}(\lambda))}{\partial \begin{pmatrix} \beta \\ \gamma \end{pmatrix} \partial \begin{pmatrix} \beta \\ \gamma \end{pmatrix}^T} \end{pmatrix}.$$

418 8. Apply the “non-exact”  $t$ -type test [28]. For the  $s$ -th coordinate,

$$420 \quad \frac{\begin{pmatrix} \hat{\beta}(\lambda) \\ \hat{\gamma}(\lambda) \end{pmatrix}_s}{\sqrt{\text{Var} \left[ \begin{pmatrix} \hat{\beta}(\lambda) \\ \hat{\gamma}(\lambda) \end{pmatrix} \right]_{s,s}}} \sim t_{n-p}, \quad (16)$$

419 under the null hypothesis  $\begin{pmatrix} \beta \\ \gamma \end{pmatrix}_s = 0$ .

421 The formula (16) is the same as a Wald test, but the test differs, because the  
 422 ridge estimators are not maximum-likelihood estimators. The algorithm was  
 423 implemented as a package for the R statistical language. We used the NL2SOL  
 424 algorithm of the PORT library [29] for minimization.

425 In analyses of quantitative trait locus (QTL), such as methylation QTL  
 426 (mQTL) and expression QTL (eQTL), an association analysis that takes the  
 427 genotypes of a single nucleotide polymorphism (SNP) as  $X_{i,k}$  is repeated for  
 428 many SNPs. In order to speed up the computation, we perform rounds of  
 429 linear regression. First, the parameters  $\hat{\alpha}(0)$  and  $\hat{\gamma}(0)$  are fit by ordinary  
 430 linear regression under  $\beta = \mathbf{0}$ , which does not depend on  $X_{i,k}$ . By taking the  
 431 residuals, we practically dispense with  $\hat{\alpha}(0)$  and  $\hat{\gamma}(0)$  in the remaining steps.  
 432 Next, for  $X_{i,k}$  of each SNP,  $\hat{\beta}(0)$  is fit by ordinary linear regression under  $\alpha =$   
 433  $\hat{\alpha}(0)$ ,  $\gamma = \hat{\gamma}(0)$ . The regularization parameter  $\lambda$  is computed according to  
 434 steps 4 and 5 above. Finally,  $\hat{\beta}(\lambda)$  is fitted and tested by linear ridge  
 435 regression under  $\alpha = \hat{\alpha}(0)$ ,  $\gamma = \hat{\gamma}(0)$ .



## 436 **Multicollinearity of interaction terms**

437 The regressors for cell-type-specific trait effects in the full model (equation  
 438 (2)) are the interaction terms  $W_{h,i}X_{i,k}$ . To assess multicollinearity, we  
 439 mathematically derive the correlation coefficient between two interaction  
 440 terms  $W_{h,i}X_{i,k}$  and  $W_{h',i}X_{i,k}$ . In this section, we treat  $W_{h,i}$ ,  $W_{h',i}$  and  $X_{i,k}$  as  
 441 sampled instances of random variables  $W_h$ ,  $W_{h'}$  and  $X_k$ , respectively. For  
 442 simplicity, we assume  $W_h$  and  $W_{h'}$  are independent of  $X_k$ . Let  $E[\bullet]$ ,  $\text{Var}[\bullet]$ ,  
 443  $\text{Cov}[\bullet]$  and  $\text{Cor}[\bullet]$  denote the expectation, variance, covariance and  
 444 correlation, respectively. Since  $X_k$  is centered,  $E[W_h X_k] = E[W_{h'} X_k] = 0$ . The  
 445 correlation coefficient between interaction terms becomes

$$\begin{aligned}
 446 \quad \text{Cor}[W_h X_k, W_{h'} X_k] &= \frac{E[W_h X_k W_{h'} X_k]}{\sqrt{E[W_h^2 X_k^2]} \sqrt{E[W_{h'}^2 X_k^2]}} \\
 447 \quad &= \frac{E[W_h W_{h'}]}{\sqrt{E[W_h^2]} \sqrt{E[W_{h'}^2]}} \\
 448 \quad &= \frac{\text{Cov}[W_h, W_{h'}] + E[W_h] E[W_{h'}]}{\sqrt{\text{Var}[W_h] + E[W_h]^2} \sqrt{\text{Var}[W_{h'}] + E[W_{h'}]^2}} \\
 449 \quad &= \frac{\text{Cor}[W_h, W_{h'}] + \frac{E[W_h]}{\sqrt{\text{Var}[W_h]}} \frac{E[W_{h'}]}{\sqrt{\text{Var}[W_{h'}]}}}{\sqrt{1 + \frac{E[W_h]^2}{\text{Var}[W_h]}} \sqrt{1 + \frac{E[W_{h'}]^2}{\text{Var}[W_{h'}]}}}. \quad (17)
 \end{aligned}$$

450 If the ratios  $E[W_h]/\sqrt{\text{Var}[W_h]}$  and  $E[W_{h'}]/\sqrt{\text{Var}[W_{h}]}$  are high, the correlation of  
 451 interaction terms approaches to one, irrespective of  $\text{Cor}[W_h, W_{h'}]$ .

## 452 **EWAS of rheumatoid arthritis**

453 EWAS datasets for rheumatoid arthritis were downloaded from the Gene  
 454 Expression Omnibus (GEO). Using the RnBeads package (version 2.2.0) [30]  
 455 of R, IDAT files of HumanMethylation450 array were preprocessed by  
 456 removing low quality samples and markers, by normalizing methylation level,  
 457 and by removing markers on sex chromosomes and outlier samples. The  
 458 association of methylation level with disease status was tested with

459 adjustment for sex, age, smoking status and experiment batch; the  
460 covariates were assumed to have uniform effects across cell types. After  
461 quality control, dataset GSE42861 included bulk peripheral blood leukocyte  
462 data for 336 cases and 322 controls [20]. GSE131989 included sorted CD14<sup>+</sup>  
463 monocyte data for 63 cases and 31 controls [21]. By meta-analysis of  
464 GSE131989 and GSE87095 [19], we obtained sorted CD19<sup>+</sup> B cell data for  
465 108 cases and 95 controls. The cell type composition of bulk samples was  
466 imputed using the Houseman algorithm [31] in the GLINT software (version  
467 1.0.4) [32].

#### 468 **Differential gene expression by age**

469 Whole blood RNA-seq data of GTEx v7 was downloaded from the GTEx  
470 website [22]. Genes of low quality or on sex chromosomes were removed,  
471 expression level was normalized, outlier samples were removed, and 389  
472 samples were retained. The association of read count with age was tested  
473 with adjustment for sex. From GEO dataset GSE56047 [23], we obtained  
474 sorted CD14<sup>+</sup> monocyte data for 1202 samples and sorted CD4<sup>+</sup> T cell data  
475 for 214 samples. The cell type composition of bulk samples was imputed using  
476 the DeconCell package (version 0.1.0) [9] of R.

#### 477 **Simulation of cell-type-specific disease association**

478 Bulk tissue sample data for case-control comparison were simulated based  
479 on real data. We generated four scenarios. Each omics marker was simulated  
480 independently. The mean expression level was defined for each cell type,  
481 separately in cases and controls. The standard deviation (SD) was set to be  
482 the same for each combination. We tested disease association specific to one  
483 cell type, which we call the target cell type. In each scenario, the mean  
484 expression level was set as follows.

- 485 A. The mean was equal for all cell types both in cases and controls (null  
486 scenario).
- 487 B. The mean in cases was higher by 1 SD for the target cell type. Other  
488 combinations had the same mean value.

489 C. The mean in cases was lower by 1 SD for one non-target cell type. Other  
490 combinations had the same mean value.

491 D. The mean in cases was higher by 1 SD for the target cell type, and lower  
492 by 1 SD for one non-target cell type. Other combinations had the same  
493 middle mean value.

494 The target and non-target cell types were randomly chosen for each marker.  
495 For each sample, the cell-type-specific expression level was randomly  
496 sampled from a normal distribution that was specified in the scenario. The  
497 cell-type-specific expression levels were converted to the linear scale, and  
498 then averaged across cell types, according to the predefined cell type  
499 composition. The result becomes the bulk expression level of the sample in  
500 linear scale.

501 We used the above-mentioned bulk tissue data, namely DNA methylation  
502 data for 658 peripheral blood leukocyte samples (GSE42861) and gene  
503 expression data for 389 whole blood samples (GTEx). We applied the same  
504 simulation procedure to each dataset. The cell type composition in the original  
505 data was retained for all samples. Half of the samples were randomly  
506 assigned as cases, and the other half were assigned as controls. Normalizing  
507 transformation (i.e., logit or log) was applied to the bulk expression data, and  
508 500 omics markers were randomly selected. For each marker, we measured  
509 the average  $\mu$  and the standard deviation  $\sigma$  of the expression level. For  
510 control samples, the expression level in each cell type was sampled from  
511  $N(\mu, \sigma^2)$ . For case samples, the expression level in each cell type was sampled  
512 from  $N(\mu, \sigma^2)$ ,  $N(\mu + \sigma, \sigma^2)$  or  $N(\mu - \sigma, \sigma^2)$  according to the scenario.

### 513 **Evaluation of statistical methods**

514 Cell-type-specific effects of traits was statistically tested by using bulk tissue  
515 data as input. We applied the omicwas package with the normalizing function  
516  $f = \text{log}, \text{logit}, \text{identity}$  without ridge regularization (omicwas.log,  
517 omicwas.logit, omicwas.identity) or under ridge regression  
518 (omicwas.log.ridge, omicwas.logit.ridge, omicwas.identity.ridge). The  
519 omicwas package was used also for conventional linear regression under the  
520 full and marginal models.

521 Among previous methods, we evaluated those that accept cell type  
522 composition as input and compute test statistics for cell-type-specific  
523 association. For DNA methylation data, we applied TOAST (version 1.2.0)  
524 [10], CellDMC (version 2.4.0) [13] and TCA (version 1.1.0) [14]. CellDMC  
525 first tests association for all combinations, and then filters out those not  
526 differentially methylated. We took all of the initial results as  
527 CellDMC.unfiltered; in CellDMC.filtered, Z-score was set to zero for those  
528 filtered out. For gene expression data, we applied TOAST and csSAM (version  
529 1.4) [5]. For csSAM, we either fitted all cell types together or one cell type at  
530 a time, and denoted the results as csSAM.lm and csSAM.monovariate,  
531 respectively. The csSAM method is applicable to binomial traits but not to  
532 quantitative traits.

533 For simulated data, we adopted the nominal significance level  $P < 0.05$   
534 (two-sided). In scenario B, the power was defined as the frequency of Z-score  
535  $> 1.96$ .

536 For the association with rheumatoid arthritis and age, “true” association  
537 was determined from the measurements in physically sorted blood cells,  
538 under the nominal significance level  $P < 0.05$  (two-sided). The significant  
539 markers were “up-regulated” (in rheumatoid arthritis cases or elders) or  
540 “down-regulated.” For a set of differentially expressed markers in a cell type  
541 (e.g., up-regulated in monocytes), the prediction performance of an  
542 algorithm was measured by the area under the curve (AUC) of receiver  
543 operating characteristic (ROC). Standard error of AUC was computed by the  
544 jackknife estimator by splitting the markers into 100 groups by chromosomal  
545 position. The relative performance of an algorithm was evaluated by its AUC  
546  $- 0.5$  divided by that for the best algorithm in each scenario.

547

#### 548 **Supplementary information**

549 **Additional file 1: Table S1.** Blood cell type proportion in Tsimane  
550 Amerindians, Caucasians and Hispanics.

551 **Additional file 2: Supplementary note.** Asymptotic distribution of ridge  
552 estimator.

553 **Abbreviations**

554 AUC : area under the curve, eQTL: expression QTL, EWAS: epigenome-wide  
555 association study, GEO: Gene Expression Omnibus, mQTL: methylation QTL,  
556 MSE: mean squared error, OLS: ordinary least squares, QTL: quantitative trait  
557 locus, ROC: receiver operating characteristic, SD: standard deviation, SNP:  
558 single nucleotide polymorphism

559 **Declarations**

560 **Ethics approval and consent to participate**

561 Not applicable.

562 **Consent for publication**

563 Not applicable.

564 **Availability of data and materials**

565 The datasets generated and analyzed during the current study are available  
566 in the figshare repository, <https://dx.doi.org/10.6084/m9.figshare.10718282>

567 **Competing interests**

568 The authors declare that they have no competing interests.

569 **Funding**

570 This work was supported by JSPS KAKENHI [grant number JP16K07218] and  
571 by the NCGM Intramural Research Fund [grant numbers 19A2004, 20A1013].  
572 The funding body had no role in the design and collection of the study,  
573 experiments, analyses and interpretations of data, and in writing the  
574 manuscript.

575 **Author's contributions**

576 FT developed the methodology, wrote the software, implemented the study,  
577 and wrote the manuscript. NK revised the manuscript. All authors read and  
578 approved the final manuscript.

579 **Acknowledgements**

580 Not applicable.

581

582 **References**

583 1. Teschendorff AE, Zheng SC. Cell-type deconvolution in epigenome-wide  
584 association studies: a review and recommendations. *Epigenomics*.  
585 2017;9:757–68.

586 2. Sturm G, Finotello F, Petitprez F, Zhang JD, Baumbach J, Fridman WH, et  
587 al. Comprehensive evaluation of transcriptome-based cell-type  
588 quantification methods for immuno-oncology. *Bioinformatics*.  
589 2019;35:i436–45.

590 3. Ghosh D. Mixture models for assessing differential expression in complex  
591 tissues using microarray data. *Bioinformatics*. 2004;20:1663–9.

592 4. Stuart RO, Wachsman W, Berry CC, Wang-Rodriguez J, Wasserman L,  
593 Klacansky I, et al. In silico dissection of cell-type-associated patterns of  
594 gene expression in prostate cancer. *Proc Natl Acad Sci USA*. National  
595 Academy of Sciences; 2004;101:615–20.

596 5. Shen-Orr SS, Tibshirani R, Khatri P, Bodian DL, Staedtler F, Perry NM, et  
597 al. Cell type-specific gene expression differences in complex tissues. *Nat*  
598 *Meth*. Nature Publishing Group; 2010;7:287–9.

599 6. Erkkilä T, Lehmusvaara S, Ruusuvaara P, Visakorpi T, Shmulevich I,  
600 Lähdesmäki H. Probabilistic analysis of gene expression measurements from  
601 heterogeneous tissues. *Bioinformatics*. 2010;26:2571–7.

602 7. Kuhn A, Thu D, Waldvogel HJ, Faull RLM, Luthi-Carter R. Population-  
603 specific expression analysis (PSEA) reveals molecular changes in diseased  
604 brain. *Nat Meth*. Nature Publishing Group; 2011;8:945–7.

605 8. Westra H-J, Arends D, Esko T, Peters MJ, Schurmann C, Schramm K, et  
606 al. Cell Specific eQTL Analysis without Sorting Cells. Pastinen T, editor. *PLoS*

- 607 Genet. Public Library of Science; 2015;11:e1005223–17.
- 608 9. Aguirre-Gamboa R, de Klein N, di Tommaso J. Deconvolution of bulk  
609 blood eQTL effects into immune cell subpopulations. bioRxiv. 2019.
- 610 10. Li Z, Wu Z, Jin P, Wu H. Dissecting differential signals in high-  
611 throughput data from complex tissues. Hancock J, editor. Bioinformatics.  
612 2019;35:3898–905.
- 613 11. Montañó CM, Irizarry RA, Kaufmann WE, Talbot K, Gur RE, Feinberg AP,  
614 et al. Measuring cell-type specific differential methylation in human brain  
615 tissue. Genome Biol. BioMed Central; 2013;14:R94–9.
- 616 12. White N, Benton M, Kennedy D, Fox A, Griffiths L, Lea R, et al.  
617 Accounting for cell lineage and sex effects in the identification of cell-  
618 specific DNA methylation using a Bayesian model selection algorithm.  
619 Sawalha AH, editor. PLoS ONE. 2017;12:e0182455–18.
- 620 13. Zheng SC, Breeze CE, Beck S, Teschendorff AE. Identification of  
621 differentially methylated cell types in epigenome-wide association studies.  
622 Nat Meth. Nature Publishing Group; 2018;15:1059–66.
- 623 14. Rahmani E, Schweiger R, Rhead B, Criswell LA, Barcellos LF, Eskin E, et  
624 al. Cell-type-specific resolution epigenetics without the need for cell sorting  
625 or single-cell biology. Nature Communications. Nature Publishing Group;  
626 2019;10:3417–11.
- 627 15. Cobos FA, Vandesompele J, Mestdagh P. Computational deconvolution  
628 of transcriptomics data from mixed cell populations. Bioinformatics.  
629 2018;34:1969–79.
- 630 16. Hoyle DC, Rattray M, Jupp R, Brass A. Making sense of microarray data  
631 distributions. Bioinformatics. 2002;18:576–84.
- 632 17. Du P, Zhang X, Huang C-C, Jafari N, Kibbe WA, Hou L, et al.  
633 Comparison of Beta-value and M-value methods for quantifying methylation

- 634 levels by microarray analysis. BMC Bioinformatics. BioMed Central;  
635 2010;11:1–9.
- 636 18. Aiken LS, West SG. Multiple Regression: Testing and Interpreting  
637 Interactions. Sage Publications; 1991.
- 638 19. Julià A, Absher D, López-Lasanta M, Palau N, Pluma A, Waite Jones L, et  
639 al. Epigenome-wide association study of rheumatoid arthritis identifies  
640 differentially methylated loci in B cells. Hum Mol Genet. 2017;26:2803–11.
- 641 20. Liu Y, Aryee MJ, Padyukov L, Fallin MD, Hesselberg E, Runarsson A, et  
642 al. Epigenome-wide association data implicate DNA methylation as an  
643 intermediary of genetic risk in rheumatoid arthritis. Nat Biotechnol. Nature  
644 Publishing Group; 2013;31:142–7.
- 645 21. Rhead B, Holingue C, Cole M, Shao X, Quach HL, Quach D, et al.  
646 Rheumatoid Arthritis Naive T Cells Share Hypermethylation Sites With  
647 Synoviocytes. Arthritis & Rheumatology. John Wiley & Sons, Ltd;  
648 2017;69:550–9.
- 649 22. GTEx Consortium. Genetic effects on gene expression across human  
650 tissues. Nature. Nature Publishing Group; 2017;550:204–13.
- 651 23. Reynolds LM, Taylor JR, Ding J, Lohman K, Johnson C, Siscovick D, et  
652 al. Age-related variations in the methylome associated with gene expression  
653 in human monocytes and T cells. Nature Communications. 2014;5:5366.
- 654 24. Riazoshams H, Midi H, Ghilagaber G. Robust Nonlinear Regression: with  
655 Applications using R. John Wiley & Sons; 2019.
- 656 25. Lim C. Robust ridge regression estimators for nonlinear models with  
657 applications to high throughput screening assay data. Statist. Med.  
658 2014;34:1185–98.
- 659 26. Lawless JF, Wang P. A simulation study of ridge and other regression  
660 estimators. Communications in Statistics - Theory and Methods.



- 661 1976;5:307–23.
- 662 27. Hoerl AE, Kannard RW, Baldwin KF. Ridge regression: some simulations.  
663 Communications in Statistics - Theory and Methods. 1975;4:105–23.
- 664 28. Halawa AM, Bassiouni El MY. Tests of regression coefficients under ridge  
665 regression models. Journal of Statistical Computation and Simulation.  
666 2000;65:341–56.
- 667 29. Dennis JE, Gay DM, Welsch RE. An adaptive nonlinear least-squares  
668 algorithm. ACM Transactions on Mathematical Software. 1981;7:348–68.
- 669 30. Müller F, Scherer M, Assenov Y, Lutsik P, Walter J, Lengauer T, et al.  
670 RnBeads 2.0: comprehensive analysis of DNA methylation data. Genome  
671 Biol. BioMed Central; 2019;20:55–12.
- 672 31. Houseman EA, Accomando WP, Koestler DC, Christensen BC, Marsit CJ,  
673 Nelson HH, et al. DNA methylation arrays as surrogate measures of cell  
674 mixture distribution. BMC Bioinformatics. 2012;13:86.
- 675 32. Rahmani E, Yedidim R, Shenhav L, Schweiger R, Weissbrod O, Zaitlen  
676 N, et al. GLINT: a user-friendly toolset for the analysis of high-throughput  
677 DNA-methylation array data. Hancock JM, editor. Bioinformatics.  
678 2017;33:1870–2.
- 679

680 **TABLES**

681

**Table 1A** Blood cell type proportion in rheumatoid arthritis dataset

| Cell type | Neu  | CD4+T | CD8+T | NK   | Mono | Bcells | Eos  |
|-----------|------|-------|-------|------|------|--------|------|
| Mean      | 0.59 | 0.10  | 0.08  | 0.08 | 0.07 | 0.07   | 0.01 |
| SD        | 0.11 | 0.06  | 0.05  | 0.04 | 0.02 | 0.03   | 0.02 |
| Mean/SD   | 5.3  | 1.8   | 1.6   | 1.9  | 3.2  | 2.6    | 0.4  |

**Table 1B** Correlation between blood cell type proportion and rheumatoid arthritis ( $X_k$ )

| $r$           | Neu   | CD4+T | CD8+T | NK    | Mono  | Bcells | Eos   | $X_k$ =Disease |
|---------------|-------|-------|-------|-------|-------|--------|-------|----------------|
| <b>Neu</b>    | 1     | -0.68 | -0.60 | -0.46 | -0.06 | -0.49  | -0.48 | 0.44           |
| <b>CD4+T</b>  | -0.68 | 1     | 0.14  | 0.05  | -0.17 | 0.38   | 0.26  | -0.33          |
| <b>CD8+T</b>  | -0.60 | 0.14  | 1     | 0.08  | -0.05 | 0.19   | 0.13  | -0.27          |
| <b>NK</b>     | -0.46 | 0.05  | 0.08  | 1     | -0.04 | 0.01   | 0.11  | -0.27          |
| <b>Mono</b>   | -0.06 | -0.17 | -0.05 | -0.04 | 1     | -0.17  | 0.05  | 0.10           |
| <b>Bcells</b> | -0.49 | 0.38  | 0.19  | 0.01  | -0.17 | 1      | 0.11  | -0.22          |
| <b>Eos</b>    | -0.48 | 0.26  | 0.13  | 0.11  | 0.05  | 0.11   | 1     | -0.10          |

**Table 1C** Correlation between interaction terms

| $r$                            | Neu* $X_k$ | CD4+T* $X_k$ | CD8+T* $X_k$ | NK* $X_k$ | Mono* $X_k$ | Bcells* $X_k$ | Eos* $X_k$ |
|--------------------------------|------------|--------------|--------------|-----------|-------------|---------------|------------|
| <b>Neu*<math>X_k</math></b>    | 1          | 0.83         | 0.80         | 0.85      | 0.93        | 0.90          | 0.27       |
| <b>CD4+T*<math>X_k</math></b>  | 0.83       | 1            | 0.78         | 0.78      | 0.83        | 0.88          | 0.42       |
| <b>CD8+T*<math>X_k</math></b>  | 0.80       | 0.78         | 1            | 0.77      | 0.82        | 0.83          | 0.35       |
| <b>NK*<math>X_k</math></b>     | 0.85       | 0.78         | 0.77         | 1         | 0.85        | 0.83          | 0.35       |
| <b>Mono*<math>X_k</math></b>   | 0.93       | 0.83         | 0.82         | 0.85      | 1           | 0.88          | 0.35       |
| <b>Bcells*<math>X_k</math></b> | 0.90       | 0.88         | 0.83         | 0.83      | 0.88        | 1             | 0.36       |
| <b>Eos*<math>X_k</math></b>    | 0.27       | 0.42         | 0.35         | 0.35      | 0.35        | 0.36          | 1          |

Neu, neutrophils; Mono, monocytes; Eos, eosinophils.

682

683

**Table 2A** Blood cell type proportion in GTEx dataset

| Cell type | Gran  | CD4+T | CD8+T | Mono  | NK    | Bcells |
|-----------|-------|-------|-------|-------|-------|--------|
| Mean      | 0.53  | 0.22  | 0.10  | 0.07  | 0.05  | 0.03   |
| SD        | 0.037 | 0.020 | 0.013 | 0.004 | 0.012 | 0.003  |
| Mean/SD   | 14.4  | 10.7  | 7.7   | 16.6  | 4.3   | 8.3    |

**Table 2B** Correlation between blood cell type proportion and age ( $X_k$ )

| $r$           | Gran  | CD4+T | CD8+T | Mono  | NK    | Bcells | $X_k$ =Age |
|---------------|-------|-------|-------|-------|-------|--------|------------|
| <b>Gran</b>   | 1     | -0.89 | -0.83 | 0.56  | -0.76 | -0.41  | -0.23      |
| <b>CD4+T</b>  | -0.89 | 1     | 0.59  | -0.64 | 0.50  | 0.51   | 0.14       |
| <b>CD8+T</b>  | -0.83 | 0.59  | 1     | -0.40 | 0.59  | 0.15   | 0.15       |
| <b>Mono</b>   | 0.56  | -0.64 | -0.40 | 1     | -0.44 | -0.42  | 0.02       |
| <b>NK</b>     | -0.76 | 0.50  | 0.59  | -0.44 | 1     | 0.13   | 0.31       |
| <b>Bcells</b> | -0.41 | 0.51  | 0.15  | -0.42 | 0.13  | 1      | -0.03      |

**Table 2C** Correlation between interaction terms

| $r$                            | Gran* $X_k$ | CD4+T* $X_k$ | CD8+T* $X_k$ | Mono* $X_k$ | NK* $X_k$ | Bcells* $X_k$ |
|--------------------------------|-------------|--------------|--------------|-------------|-----------|---------------|
| <b>Gran*<math>X_k</math></b>   | 1           | 0.99         | 0.98         | 1.00        | 0.96      | 0.99          |
| <b>CD4+T*<math>X_k</math></b>  | 0.99        | 1            | 1.00         | 0.99        | 0.98      | 1.00          |
| <b>CD8+T*<math>X_k</math></b>  | 0.98        | 1.00         | 1            | 0.99        | 0.98      | 0.99          |
| <b>Mono*<math>X_k</math></b>   | 1.00        | 0.99         | 0.99         | 1           | 0.96      | 0.99          |
| <b>NK*<math>X_k</math></b>     | 0.96        | 0.98         | 0.98         | 0.96        | 1         | 0.97          |
| <b>Bcells*<math>X_k</math></b> | 0.99        | 1.00         | 0.99         | 0.99        | 0.97      | 1             |

Gra, granulocytes; Mono, monocytes.

684

## 685 **FIGURE LEGENDS**

### 686 **Figure 1**

687 Contour plot of the correlation coefficient between interaction terms  $W_h X_k$   
688 and  $W_{h'} X_k$ .  $W_h$  and  $W_{h'}$  represent proportions of cell types  $h$  and  $h'$ , and  $X_k$   
689 represents the value of trait  $k$ . For this plot, we assume the ratios  
690  $E[W_h]/SD[W_h]$  and  $E[W_{h'}]/SD[W_{h'}]$  to be equal. As the ratio increases 1.5, 2 to  
691 3, the correlation coefficient raises  $>0.5$ ,  $>0.7$  to  $>0.8$ , over most range of  
692  $Cor[W_h, W_{h'}]$ . SD stands for standard deviation.

### 693 **Figure 2**

694 Detection of cell-type-specific association in simulated data for DNA  
695 methylation. (A), (B), (C) and (D) correspond to the respective scenarios.  
696 Results from different algorithms are aligned horizontally. Vertical axis  
697 indicates the Z-score for the disease effect (cases vs controls) specific to the  
698 target cell type. Points are colored according to the target cell type. The  
699 middle bar of the box plot indicates the median, and the lower and upper  
700 hinges correspond to the first and third quartiles. The whiskers extend to the  
701 value no further than  $1.5 * \text{inter-quartile range}$  from the hinges. Neu,  
702 neutrophils; Mono, monocytes; Eos, eosinophils.

### 703 **Figure 3**

704 Detection of cell-type-specific association in simulated data for gene  
705 expression. (A), (B), (C) and (D) correspond to the respective scenarios.  
706 Results from different algorithms are aligned horizontally. Vertical axis  
707 indicates the Z-score for the disease effect (cases vs controls) specific to the  
708 target cell type. Points are colored according to the target cell type. The  
709 middle bar of the box plot indicates the median, and the lower and upper  
710 hinges correspond to the first and third quartiles. The whiskers extend to the  
711 value no further than  $1.5 * \text{inter-quartile range}$  from the hinges. Gra,  
712 granulocytes; Mono, monocytes.

713 **Figure 4**

714 Performance of cell-type-specific association prediction. For rheumatoid  
715 arthritis association of DNA methylation in monocytes (A) and B cells (B);  
716 Age association of gene expression in CD4<sup>+</sup> T cells (C) and monocytes (D).  
717 The prediction is evaluated separately for up-regulated and down-regulated  
718 markers. The AUC of ROC and its 95% confidence interval are plotted for each  
719 statistical algorithm.  
720

Figure 1

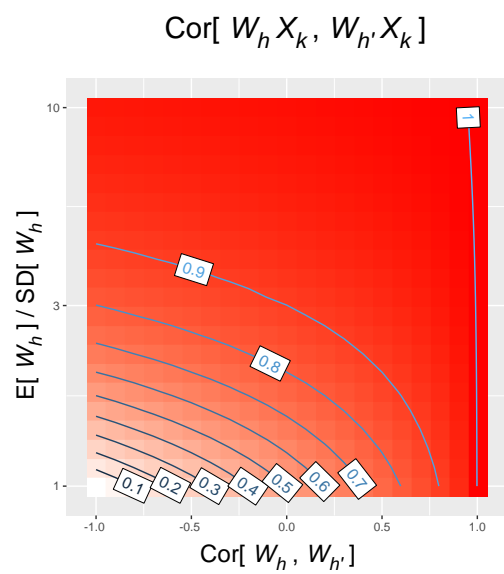

Figure 2

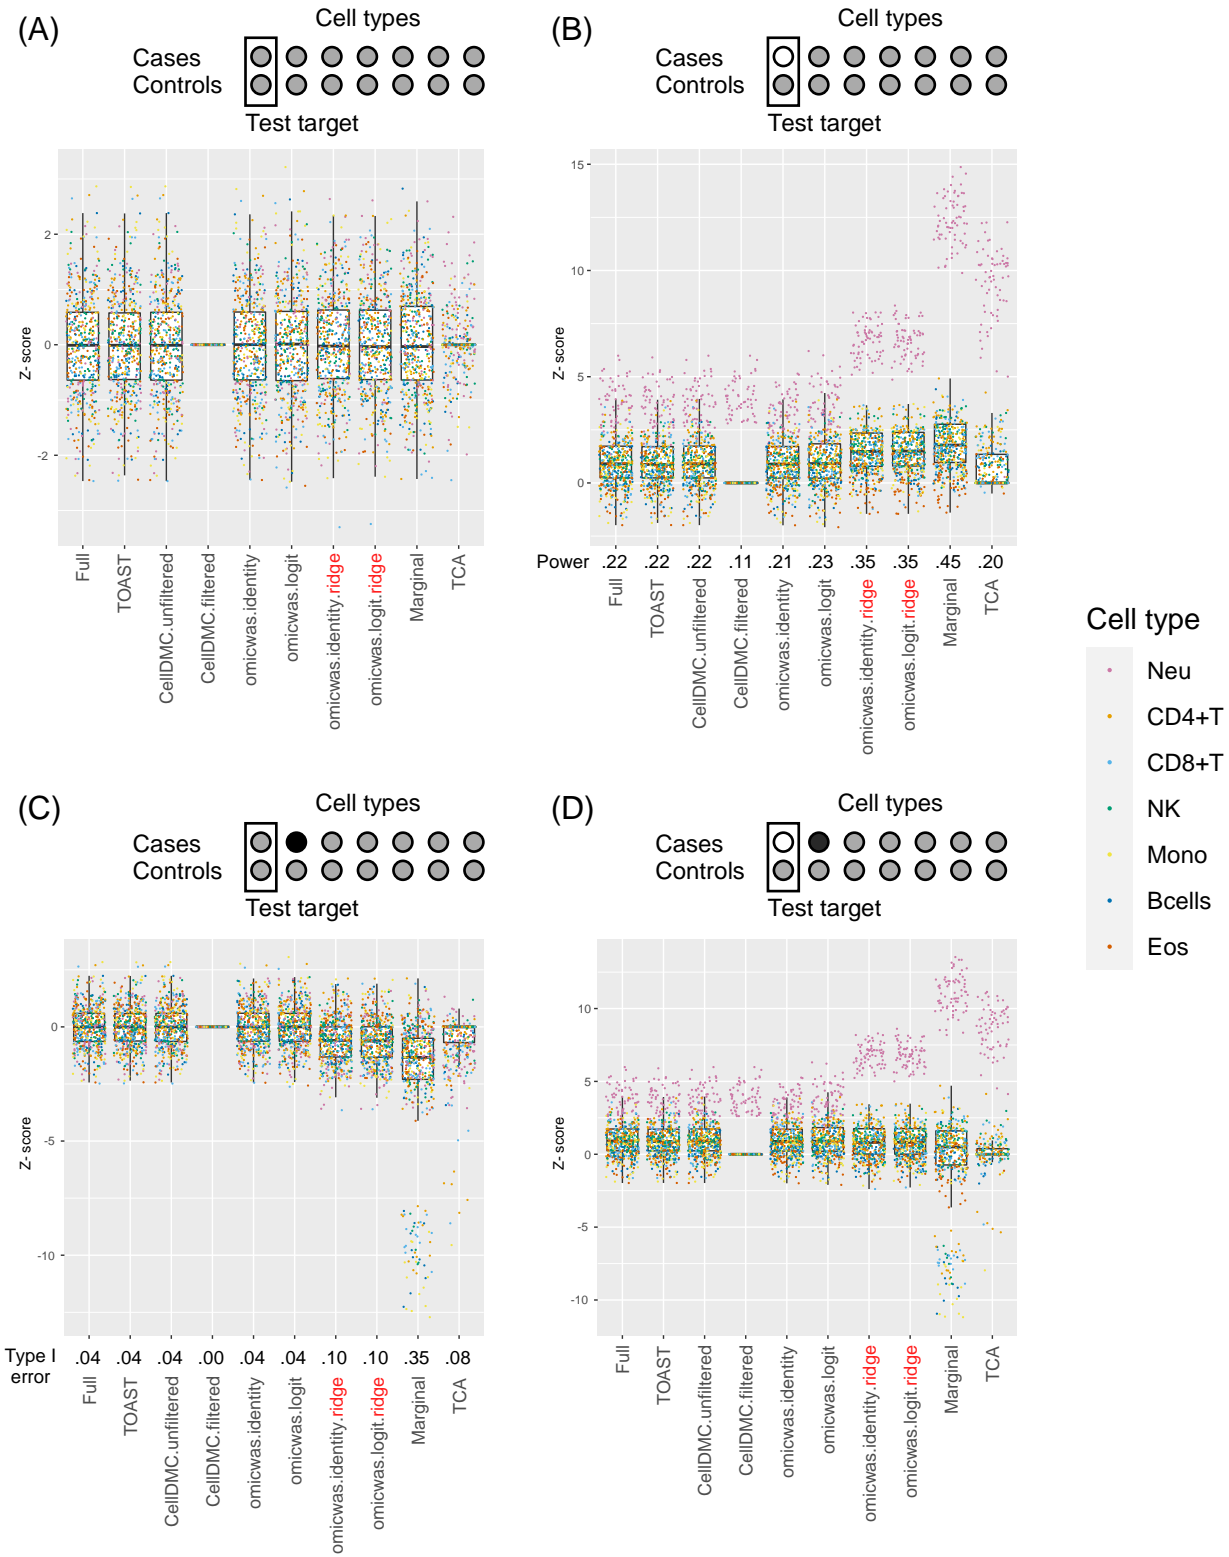

Figure 3

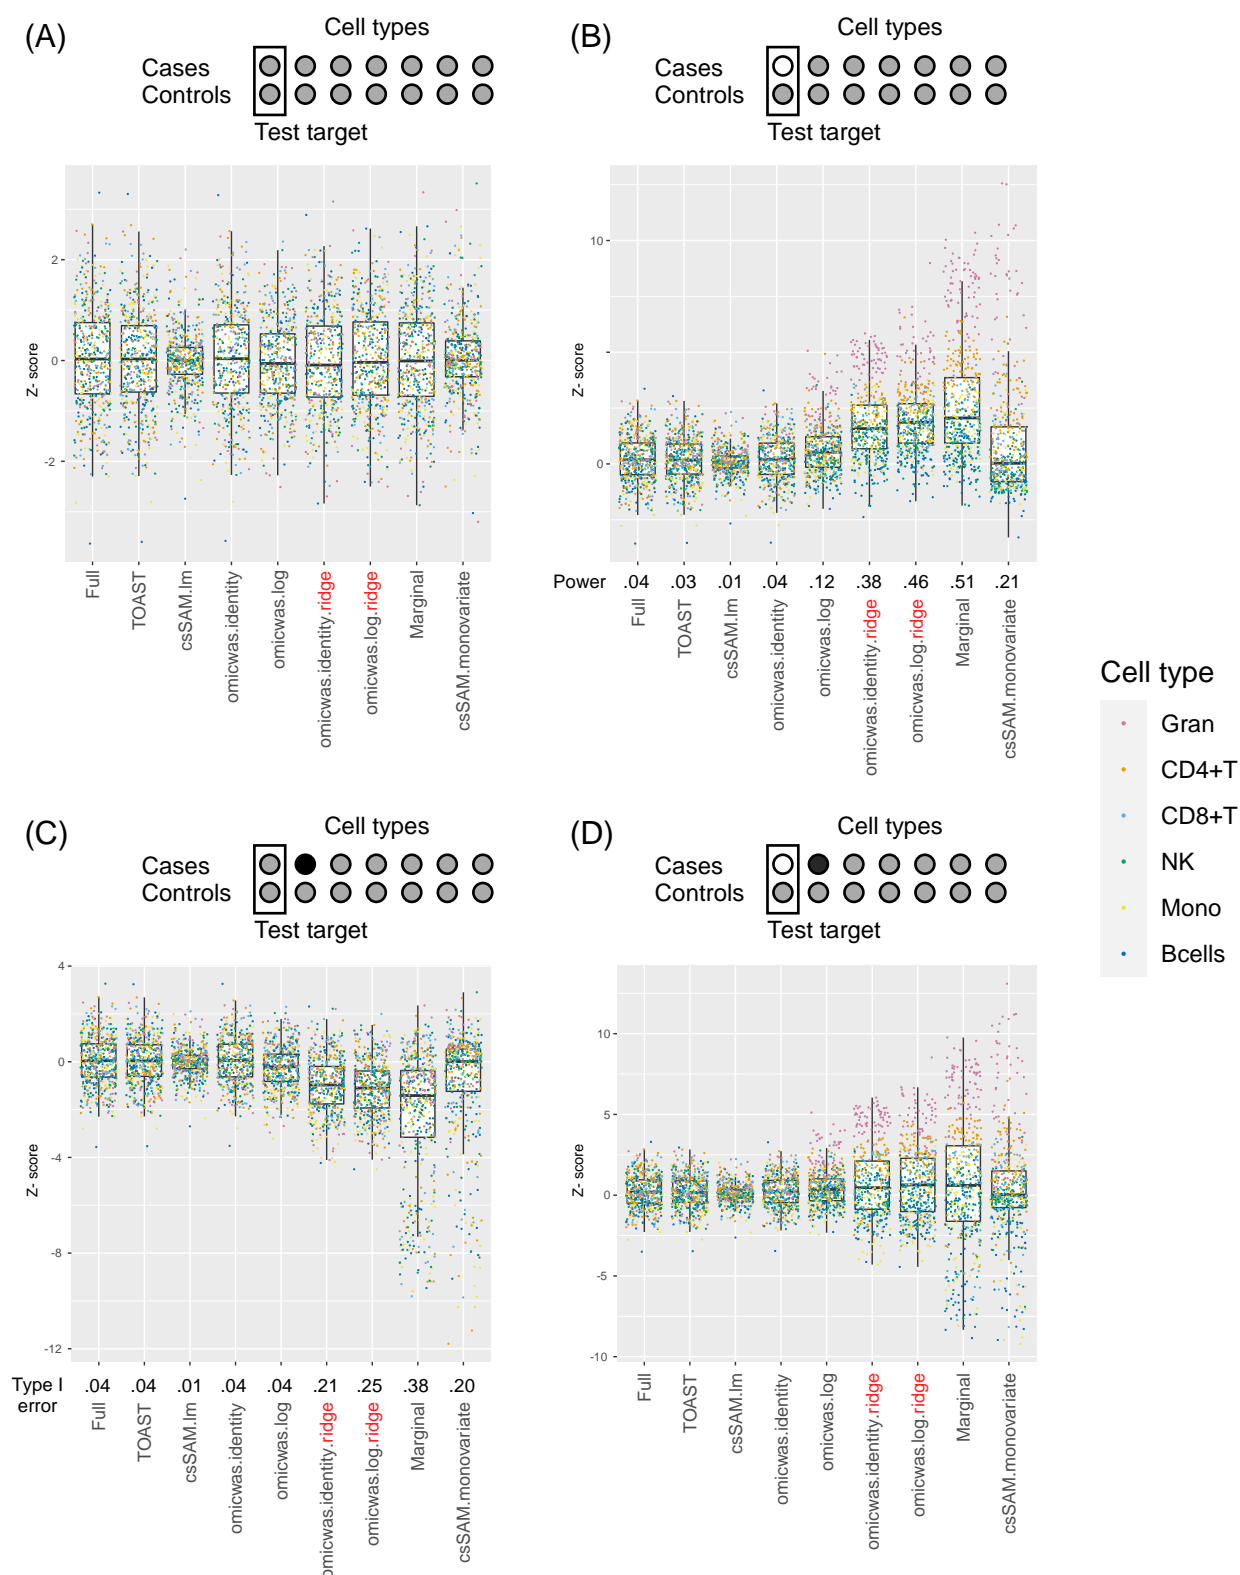



Figure 4

(A) Rheumatoid arthritis association in Monocytes

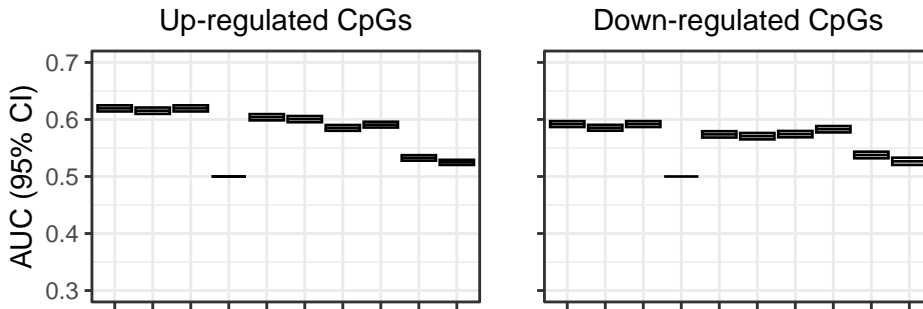

(B) Rheumatoid arthritis association in B cells

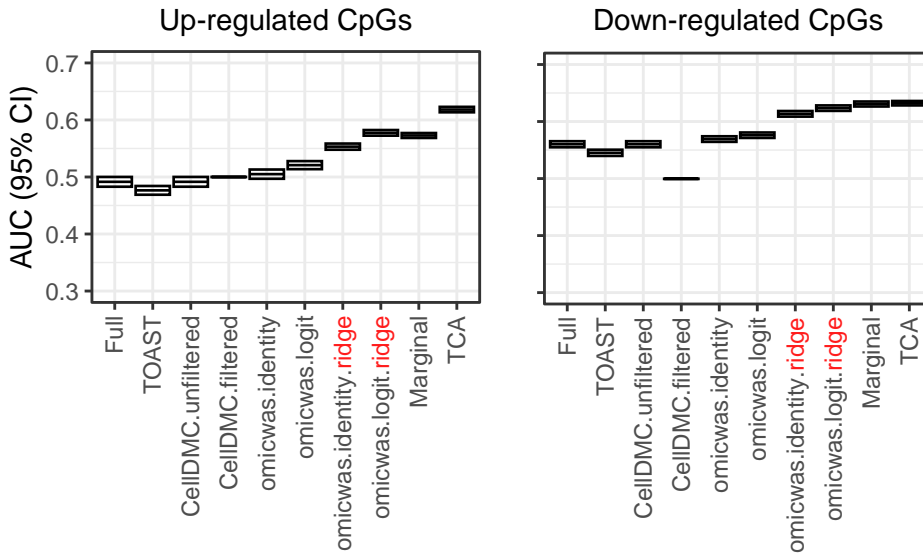

(C) Age association in CD4+ T cells

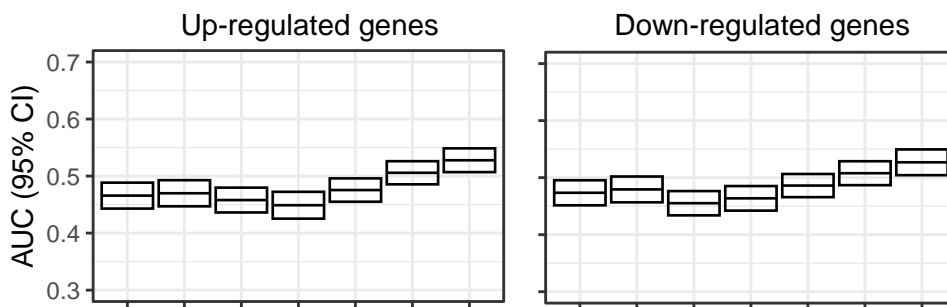

(D) Age association in Monocytes

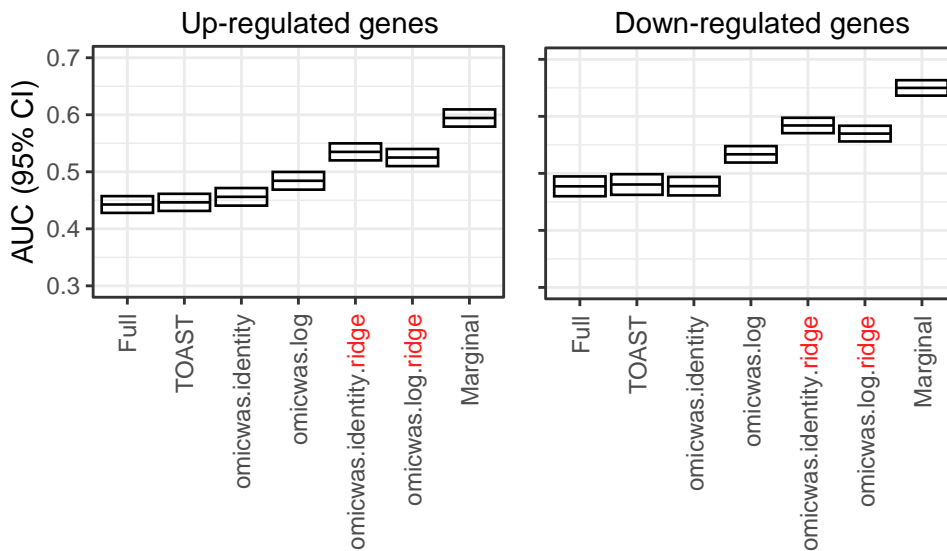

Source: https://biorxiv.org/content/10.1101/2020.06.18.158758v1.full.pdf
