# Supplementary material for: Nonlinear ridge regression improves cell-type-specific differential expression analysis
Source: bioRxiv or medRxiv preprint supplement (doi:10.1101/2020.06.18.158758), 2020-12-30
Supplement: Supplementary file [file media-1.pdf]

**Table S1A** Blood cell type proportion in Tsimane Amerindians

| Cell type | Gran | CD4+T | NK   | Mono | Bcells | CD8+T |
|-----------|------|-------|------|------|--------|-------|
| Mean      | 0.65 | 0.14  | 0.08 | 0.08 | 0.06   | 0.05  |
| SD        | 0.10 | 0.06  | 0.05 | 0.02 | 0.03   | 0.04  |
| Mean/SD   | 6.3  | 2.1   | 1.7  | 3.1  | 2.1    | 1.3   |

Older Tsimane cohort (n=310) from [Hovarth et al. Genome Biology (2016) 17:171]. GEO accession no. GSE72773.

**Table S1B** Blood cell type proportion in Caucasians

| Cell type | Gran | CD4+T | NK   | Mono | Bcells | CD8+T |
|-----------|------|-------|------|------|--------|-------|
| Mean      | 0.68 | 0.13  | 0.07 | 0.08 | 0.05   | 0.04  |
| SD        | 0.10 | 0.06  | 0.04 | 0.02 | 0.05   | 0.05  |
| Mean/SD   | 6.6  | 2.2   | 1.7  | 3.3  | 1.1    | 1.0   |

Caucasians among the PEG cohort (n=289) from [Hovarth et al. Genome Biology (2016) 17:171]. GEO accession no. GSE72775.

**Table S1C** Blood cell type proportion in Hispanics

| Cell type | Gran | CD4+T | NK   | Mono | Bcells | CD8+T |
|-----------|------|-------|------|------|--------|-------|
| Mean      | 0.67 | 0.10  | 0.09 | 0.08 | 0.06   | 0.05  |
| SD        | 0.12 | 0.05  | 0.04 | 0.02 | 0.06   | 0.04  |
| Mean/SD   | 5.8  | 1.9   | 2.1  | 3.6  | 1.0    | 1.2   |

Hispanics among the PEG cohort (n=46) from [Hovarth et al. Genome Biology (2016) 17:171]. GEO accession no. GSE72775.

721 **Additional file 2: Supplementary note**

722 **Asymptotic distribution of ridge estimator**

723 We here show that the ridge estimator  $\hat{\boldsymbol{\theta}}(\lambda)$  is asymptotically normally  
 724 distributed with the mean and variance in equations (9) and (10). Since the  
 725 ridge estimator minimizes formula (8), its partial derivatives equal zero:

$$726 \quad (f(Y) - \boldsymbol{\mu}(\hat{\boldsymbol{\theta}}(\lambda))) \cdot \left( \frac{\partial \boldsymbol{\mu}(\hat{\boldsymbol{\theta}}(\lambda))}{\partial \boldsymbol{\theta}} \right) - \lambda \begin{pmatrix} 0 & 0 & 0 \\ 0 & I & 0 \\ 0 & 0 & 0 \end{pmatrix} \hat{\boldsymbol{\theta}}(\lambda) = \mathbf{0}, \quad (\text{A1})$$

727 where the product of  $f(Y) - \boldsymbol{\mu}(\boldsymbol{\theta})$  and the following Jacobian is taken by  
 728 multiplying for each sample and then summing up over samples. The Taylor  
 729 series of  $\boldsymbol{\mu}$  and its Jacobian with regards to the variable  $\hat{\boldsymbol{\theta}}(\lambda)$  centered at the  
 730 true parameter value  $\boldsymbol{\theta}$  become

$$731 \quad \boldsymbol{\mu}(\hat{\boldsymbol{\theta}}(\lambda)) \approx \boldsymbol{\mu}(\boldsymbol{\theta}) + \left( \frac{\partial \boldsymbol{\mu}(\boldsymbol{\theta})}{\partial \boldsymbol{\theta}} \right) (\hat{\boldsymbol{\theta}}(\lambda) - \boldsymbol{\theta}),$$

$$732 \quad \left( \frac{\partial \boldsymbol{\mu}(\hat{\boldsymbol{\theta}}(\lambda))}{\partial \boldsymbol{\theta}} \right) \approx \left( \frac{\partial \boldsymbol{\mu}(\boldsymbol{\theta})}{\partial \boldsymbol{\theta}} \right) + \left( \frac{\partial^2 \boldsymbol{\mu}(\boldsymbol{\theta})}{\partial \boldsymbol{\theta} \partial \boldsymbol{\theta}^T} \right) (\hat{\boldsymbol{\theta}}(\lambda) - \boldsymbol{\theta}),$$

733 where second or higher order terms of  $\hat{\boldsymbol{\theta}}(\lambda) - \boldsymbol{\theta}$  are neglected. By plugging  
 734 into equation (A1), we obtain

$$735 \quad (f(Y) - \boldsymbol{\mu}(\boldsymbol{\theta})) \cdot \left( \frac{\partial \boldsymbol{\mu}(\boldsymbol{\theta})}{\partial \boldsymbol{\theta}} \right) - \left\{ \left( \frac{\partial \boldsymbol{\mu}(\boldsymbol{\theta})}{\partial \boldsymbol{\theta}} \right)^T \left( \frac{\partial \boldsymbol{\mu}(\boldsymbol{\theta})}{\partial \boldsymbol{\theta}} \right) - (f(Y) - \boldsymbol{\mu}(\boldsymbol{\theta})) \cdot \left( \frac{\partial^2 \boldsymbol{\mu}(\boldsymbol{\theta})}{\partial \boldsymbol{\theta} \partial \boldsymbol{\theta}^T} \right) \right\} (\hat{\boldsymbol{\theta}}(\lambda) - \boldsymbol{\theta})$$

$$736 \quad - \lambda \begin{pmatrix} 0 & 0 & 0 \\ 0 & I & 0 \\ 0 & 0 & 0 \end{pmatrix} \hat{\boldsymbol{\theta}}(\lambda) = \mathbf{0}.$$

737 Thus,

$$738 \quad \hat{\boldsymbol{\theta}}(\lambda) = Q(\lambda)^{-1} Q(0) \boldsymbol{\theta} + Q(\lambda)^{-1} \left\{ (f(Y) - \boldsymbol{\mu}(\boldsymbol{\theta})) \cdot \left( \frac{\partial \boldsymbol{\mu}(\boldsymbol{\theta})}{\partial \boldsymbol{\theta}} \right) \right\}$$

$$739 \quad = Q(\lambda)^{-1} Q(0) \boldsymbol{\theta} + Q(\lambda)^{-1} \left( \frac{\partial \boldsymbol{\mu}(\boldsymbol{\theta})}{\partial \boldsymbol{\theta}} \right)^T \boldsymbol{\varepsilon},$$

740 where  $\boldsymbol{\varepsilon} \sim N(\mathbf{0}, \sigma^2 I)$ .

741
